# Supplementary material
Source: publisher figshare collection journal article supplement (https://tandf.figshare.com/ndownloader/files/9003538)
Supplement: Supplementary file 1 [file 9003538]

**Supplementary file**

**Table 7a.** Actor-Partner Interdependence Model T1 – T3, Model 1 – Model 3

|  | **Model 1** | | | **Model 2** | | | **Model 3** | | |
| --- | --- | --- | --- | --- | --- | --- | --- | --- | --- |
|  | **est** | **se** | **p** | **est** | **se** | **p** | **est** | **se** | **p** |
| M PTSS T1 --> M PTSS T2 | 0.587 | 0.087 | <0.001 | 0.599 | 0.085 | <0.001 | 0.684 | 0.062 | <0.001 |
| F PTSS T1 --> M PTSS T2 | 0.279 | 0.120 | 0.020 | 0.221 | 0.057 | <0.001 | 0.227 | 0.117 | 0.054 |
| M PTSS T1 --> F PTSS T2 | 0.204 | 0.066 | 0.002 | 0.221 | 0.057 | <0.001 | 0.233 | 0.064 | <0.001 |
| F PTSS T1 --> F PTSS T2 | 0.790 | 0.091 | <0.001 | 0.777 | 0.088 | <0.001 | 0.684 | 0.062 | <0.001 |
| M PTSS T2 --> M PTSS T3 | 0.678 | 0.080 | <0.001 | 0.712 | 0.071 | <0.001 | 0.637 | 0.053 | <0.001 |
| F PTSS T2 --> M PTSS T3 | 0.162 | 0.094 | 0.084 | 0.091 | 0.052 | 0.077 | 0.194 | 0.089 | 0.029 |
| M PTSS T2 --> F PTSS T3 | 0.058 | 0.066 | 0.383 | 0.091 | 0.052 | 0.077 | 0.038 | 0.056 | 0.502 |
| F PTSS T2 --> F PTSS T3 | 0.597 | 0.077 | <0.001 | 0.568 | 0.070 | <0.001 | 0.637 | 0.053 | <0.001 |
| Covariance M-F PTSS T3 | 8.506 | 5.319 | 0.110 | 8.699 | 5.359 | 0.105 | 8.611 | 5.342 | 0.107 |
| Covariance M-F PTSS T2 | 14.103 | 7.925 | 0.075 | 14.236 | 7.947 | 0.073 | 14.687 | 8.078 | 0.069 |
| Covariance M-F PTSS T1 | 15.692 | 13.712 | 0.252 | 15.692 | 13.712 | 0.252 | 15.692 | 13.712 | 0.252 |
| Variance M PTSS T2 | 87.164 | 14.527 | <0.001 | 87.441 | 14.573 | <0.001 | 88.706 | 14.784 | <0.001 |
| Variance F PTSS T2 | 48.311 | 8.165 | <0.001 | 48.382 | 8.178 | <0.001 | 49.241 | 8.322 | <0.001 |
| Variance M PTSS T3 | 49.101 | 8.755 | <0.001 | 49.564 | 8.833 | <0.001 | 49.269 | 8.788 | <0.001 |
| Variance F PTSS T3 | 33.856 | 6.032 | <0.001 | 34.012 | 6.060 | <0.001 | 34.007 | 6.059 | <0.001 |
| Variance M PTSS T1 | 162.341 | 26.510 | <0.001 | 162.341 | 26.510 | <0.001 | 162.341 | 26.510 | <0.001 |
| Variance F PTSS T1 | 85.352 | 13.938 | <0.001 | 85.352 | 13.938 | <0.001 | 85.352 | 13.938 | <0.001 |
| Intercept M PTSS T2 | 0.361 | 1.259 | 0.774 | 0.078 | 1.164 | 0.946 | -0.239 | 1.219 | 0.845 |
| Intercept F PTSS T2 | -3.997 | 0.950 | <0.001 | -4.107 | 0.926 | <0.001 | -4.553 | 0.903 | <0.001 |
| Intercept M PTSS T3 | -2.105 | 1.100 | 0.056 | -2.594 | 0.954 | 0.007 | -1.843 | 1.059 | 0.082 |
| Intercept F PTSS T3 | -6.635 | 0.910 | <0.001 | -6.867 | 0.871 | <0.001 | -6.355 | 0.818 | <0.001 |
| Mean M PTSS T1 | 3.887 | 1.471 | 0.008 | 3.887 | 1.471 | 0.008 | 3.887 | 1.471 | 0.008 |
| Mean F PTSS T1 | -3.887 | 1.067 | <0.001 | -3.887 | 1.067 | <0.001 | -3.887 | 1.067 | <0.001 |
| CFI, AIC, RMSEA | 0.979 | 3000.397 | 0.124 | 0.984 | 2997.437 | 0.090 | 0.975 | 2999.306 | 0.111 |

Note: ≤ 14 days (T1), two (T2) and four months (T3) after child’s cancer diagnosis; M=Mothers; F=Fathers; PTSS=Posttraumatic stress symptoms; est=Points estimate; se=Standard error; p=p-value; CFI=Comparative fit index; AIC=Akaike’s information criterion; RMSEA=Root mean square error of approximation.

**Table 7b.** Actor-Partner Interdependence Model T1 – T3, Model 4 – Model 6

|  | **Model 4** | | | **Model 5** | | | **Model 6** | | |
| --- | --- | --- | --- | --- | --- | --- | --- | --- | --- |
|  | **est** | **se** | **p** | **est** | **se** | **p** | **est** | **se** | **p** |
| M PTSS T1 --> M PTSS T2 | 0.441 | 0.045 | <0.001 | 0.575 | 0.086 | <0.001 | 0.634 | 0.057 | <0.001 |
| F PTSS T1 --> M PTSS T2 | 0.441 | 0.045 | <0.001 | 0.201 | 0.073 | 0.006 | 0.214 | 0.076 | 0.005 |
| M PTSS T1 --> F PTSS T2 | 0.441 | 0.045 | <0.001 | 0.127 | 0.047 | 0.006 | 0.115 | 0.046 | 0.012 |
| F PTSS T1 --> F PTSS T2 | 0.441 | 0.045 | <0.001 | 0.796 | 0.090 | <0.001 | 0.654 | 0.062 | <0.001 |
| M PTSS T2 --> M PTSS T3 | 0.361 | 0.032 | <0.001 | 0.676 | 0.076 | <0.001 | 0.634 | 0.057 | <0.001 |
| F PTSS T2 --> M PTSS T3 | 0.361 | 0.032 | <0.001 | 0.201 | 0.073 | 0.006 | 0.214 | 0.076 | 0.005 |
| M PTSS T2 --> F PTSS T3 | 0.361 | 0.032 | <0.001 | 0.127 | 0.047 | 0.006 | 0.115 | 0.046 | 0.012 |
| F PTSS T2 --> F PTSS T3 | 0.361 | 0.032 | <0.001 | 0.563 | 0.073 | <0.001 | 0.654 | 0.062 | <0.001 |
| Covariance M-F PTSS T3 | -4.341 | 6.850 | 0.526 | 8.501 | 5.377 | 0.114 | 8.390 | 5.435 | 0.123 |
| Covariance M-F PTSS T2 | 5.209 | 9.186 | 0.571 | 14.389 | 8.027 | 0.073 | 14.165 | 8.208 | 0.084 |
| Covariance M-F PTSS T1 | 15.692 | 13.712 | 0.252 | 15.692 | 13.712 | 0.252 | 15.692 | 13.712 | 0.252 |
| Variance M PTSS T2 | 91.836 | 15.306 | <0.001 | 87.728 | 14.621 | <0.001 | 87.741 | 14.623 | <0.001 |
| Variance F PTSS T2 | 64.250 | 10.858 | <0.001 | 49.231 | 8.321 | <0.001 | 51.653 | 8.730 | <0.001 |
| Variance M PTSS T3 | 61.306 | 10.962 | <0.001 | 49.289 | 8.792 | <0.001 | 49.421 | 8.817 | <0.001 |
| Variance F PTSS T3 | 46.412 | 8.269 | <0.001 | 34.497 | 6.146 | <0.001 | 35.202 | 6.272 | <0.001 |
| Variance M PTSS T1 | 162.341 | 26.510 | <0.001 | 162.341 | 26.510 | <0.001 | 162.341 | 26.510 | <0.001 |
| Variance F PTSS T1 | 85.352 | 13.938 | <0.001 | 85.352 | 13.938 | <0.001 | 85.352 | 13.938 | <0.001 |
| Intercept M PTSS T2 | 1.601 | 1.129 | 0.156 | 0.096 | 1.195 | 0.936 | -0.087 | 1.180 | 0.941 |
| Intercept F PTSS T2 | -6.469 | 0.956 | <0.001 | -3.659 | 0.932 | <0.001 | -4.190 | 0.921 | <0.001 |
| Intercept M PTSS T3 | -0.382 | 1.000 | 0.703 | -1.873 | 1.019 | 0.066 | -1.726 | 1.022 | 0.091 |
| Intercept F PTSS T3 | -8.550 | 0.872 | <0.001 | -6.967 | 0.883 | <0.001 | -6.399 | 0.854 | <0.001 |
| Mean M PTSS T1 | 3.887 | 1.471 | 0.008 | 3.887 | 1.471 | 0.008 | 3.887 | 1.471 | 0.008 |
| Mean F PTSS T1 | -3.887 | 1.067 | <0.001 | -3.887 | 1.067 | <0.001 | -3.887 | 1.067 | <0.001 |
| CFI, AIC, RMSEA | 0.72 | 3051.551 | 0.287 | 0.974 | 2999.643 | 0.114 | 0.959 | 3000.872 | 0.123 |

Note: ≤ 14 days (T1), two (T2) and four months (T3) after child’s cancer diagnosis; M=Mothers; F=Fathers; PTSS=Posttraumatic stress symptoms; est=Points estimate; se=Standard error; p=p-value; CFI=Comparative fit index; AIC=Akaike’s information criterion; RMSEA=Root mean square error of approximation.

**Table 7c.** Actor-Partner Interdependence Model T1 – T3, Model 7

|  | **Model 7** | | |
| --- | --- | --- | --- |
|  | **est** | **se** | **p** |
| M PTSS T1 --> M PTSS T2 | 0.646 | 0.041 | <0.001 |
| F PTSS T1 --> M PTSS T2 | 0.143 | 0.038 | <0.001 |
| M PTSS T1 --> F PTSS T2 | 0.143 | 0.038 | <0.001 |
| F PTSS T1 --> F PTSS T2 | 0.646 | 0.041 | <0.001 |
| M PTSS T2 --> M PTSS T3 | 0.646 | 0.041 | <0.001 |
| F PTSS T2 --> M PTSS T3 | 0.143 | 0.038 | <0.001 |
| M PTSS T2 --> F PTSS T3 | 0.143 | 0.038 | <0.001 |
| F PTSS T2 --> F PTSS T3 | 0.646 | 0.041 | <0.001 |
| Covariance M-F PTSS T3 | 7.650 | 5.472 | 0.162 |
| Covariance M-F PTSS T2 | 15.211 | 8.239 | 0.065 |
| Covariance M-F PTSS T1 | 15.692 | 13.712 | 0.252 |
| Variance M PTSS T2 | 88.933 | 14.822 | <0.001 |
| Variance F PTSS T2 | 51.003 | 8.621 | <0.001 |
| Variance M PTSS T3 | 49.405 | 8.808 | <0.001 |
| Variance F PTSS T3 | 35.929 | 6.402 | <0.001 |
| Variance M PTSS T1 | 162.341 | 26.510 | <0.001 |
| Variance F PTSS T1 | 85.352 | 13.938 | <0.001 |
| Intercept M PTSS T2 | -0.423 | 1.134 | 0.709 |
| Intercept F PTSS T2 | -4.322 | 0.882 | <0.001 |
| Intercept M PTSS T3 | -2.183 | 0.921 | 0.018 |
| Intercept F PTSS T3 | -6.494 | 0.800 | <0.001 |
| Mean M PTSS T1 | 3.887 | 1.471 | 0.008 |
| Mean F PTSS T1 | -3.887 | 1.067 | <0.001 |
| CFI, AIC, RMSEA | 0.960 | 2998.154 | 0.105 |

Note: ≤ 14 days (T1), two (T2) and four months (T3) after child’s cancer diagnosis; M=Mothers; F=Fathers; PTSS=Posttraumatic stress symptoms; est=Points estimate; se=Standard error; p=p-value; CFI=Comparative fit index; AIC=Akaike’s information criterion; RMSEA=Root mean square error of approximation.

**Table 8a.** Actor-Partner Interdependence Model T4 – T6, Model 1-Model 3

|  | **Model 1** | | | **Model 2** | | | **Model 3** | | |
| --- | --- | --- | --- | --- | --- | --- | --- | --- | --- |
|  | **est** | **se** | **p** | **est** | **se** | **p** | **est** | **se** | **p** |
| M PTSS T4 --> M PTSS T5 | 0.545 | 0.069 | <0.001 | 0.555 | 0.065 | <0.001 | 0.528 | 0.048 | <0.001 |
| F PTSS T4 --> M PTSS T5 | 0.096 | 0.098 | 0.326 | 0.059 | 0.045 | 0.188 | 0.108 | 0.090 | 0.229 |
| M PTSS T4 --> F PTSS T5 | 0.049 | 0.053 | 0.357 | 0.059 | 0.045 | 0.188 | 0.042 | 0.049 | 0.395 |
| F PTSS T4 --> F PTSS T5 | 0.509 | 0.073 | <0.001 | 0.497 | 0.068 | <0.001 | 0.528 | 0.048 | <0.001 |
| M PTSS T5 --> M PTSS T6 | 0.592 | 0.092 | <0.001 | 0.481 | 0.083 | <0.001 | 0.569 | 0.069 | <0.001 |
| F PTSS T5 --> M PTSS T6 | -0.217 | 0.130 | 0.095 | 0.038 | 0.068 | 0.576 | -0.194 | 0.114 | 0.089 |
| M PTSS T5 --> F PTSS T6 | 0.158 | 0.086 | 0.065 | 0.038 | 0.068 | 0.576 | 0.144 | 0.077 | 0.061 |
| F PTSS T5 --> F PTSS T6 | 0.534 | 0.119 | <0.001 | 0.660 | 0.108 | <0.001 | 0.569 | 0.069 | <0.001 |
| Covariance M-F PTSS T6 | 17.465 | 7.340 | 0.017 | 20.657 | 7.796 | 0.008 | 17.603 | 7.354 | 0.017 |
| Covariance M-F PTSS T5 | 15.111 | 6.041 | 0.012 | 15.082 | 6.049 | 0.013 | 15.134 | 6.048 | 0.012 |
| Covariance M-F PTSS T4 | 34.503 | 17.818 | 0.053 | 33.947 | 17.795 | 0.056 | 34.525 | 17.820 | 0.053 |
| Variance M PTSS T5 | 63.126 | 10.673 | <0.001 | 63.370 | 10.712 | <0.001 | 63.193 | 10.686 | <0.001 |
| Variance F PTSS T5 | 36.030 | 6.134 | <0.001 | 35.975 | 6.126 | <0.001 | 36.062 | 6.139 | <0.001 |
| Variance M PTSS T6 | 60.082 | 10.469 | <0.001 | 63.894 | 11.118 | <0.001 | 60.181 | 10.484 | <0.001 |
| Variance F PTSS T6 | 52.433 | 9.064 | <0.001 | 54.639 | 9.438 | <0.001 | 52.519 | 9.077 | <0.001 |
| Variance M PTSS T4 | 198.769 | 33.596 | <0.001 | 198.775 | 33.598 | <0.001 | 198.798 | 33.601 | <0.001 |
| Variance F PTSS T4 | 103.271 | 17.580 | <0.001 | 103.079 | 17.548 | <0.001 | 103.273 | 17.580 | <0.001 |
| Intercept M PTSS T5 | -3.431 | 1.075 | 0.001 | -3.604 | 0.989 | <0.001 | -3.319 | 1.024 | 0.001 |
| Intercept F PTSS T5 | -5.765 | 0.816 | <0.001 | -5.830 | 0.787 | <0.001 | -5.664 | 0.764 | <0.001 |
| Intercept M PTSS T6 | -5.317 | 1.330 | <0.001 | -3.652 | 1.121 | 0.001 | -5.205 | 1.281 | <0.001 |
| Intercept F PTSS T6 | -4.688 | 1.227 | <0.001 | -3.927 | 1.207 | 0.001 | -4.458 | 1.032 | <0.001 |
| Mean M PTSS T4 | 3.677 | 1.684 | 0.029 | 3.695 | 1.684 | 0.028 | 3.675 | 1.684 | 0.029 |
| Mean F PTSS T4 | -3.870 | 1.222 | 0.002 | -3.827 | 1.221 | 0.002 | -3.871 | 1.222 | 0.002 |
| CFI, AIC, RMSEA | 0.933 | 2958.382 | 0.198 | 0.915 | 2959.478 | 0.183 | 0.944 | 2954.630 | 0.148 |

Note: One week after end of child’s cancer treatment or six months after stem cell transplantation (T4), three months after end of treatment or nine months after transplantation (T5), one year after end of treatment or 18 months after transplantation (T6); M=Mothers; F=Fathers; PTSS=Posttraumatic stress symptoms; est=Points estimate; se=Standard error; p=p-value; CFI=Comparative fit index; AIC=Akaike’s information criterion; RMSEA=Root mean square error of approximation.

**Table 8b.** Actor-Partner Interdependence Model T4 – T6, Model 4-Model 6

|  | **Model 4** | | | **Model 5** | | | **Model 6** | | |
| --- | --- | --- | --- | --- | --- | --- | --- | --- | --- |
|  | **est** | **se** | **p** | **est** | **se** | **p** | **est** | **se** | **p** |
| M PTSS T4 --> M PTSS T5 | 0.281 | 0.035 | <0.001 | 0.573 | 0.068 | <0.001 | 0.561 | 0.055 | <0.001 |
| F PTSS T4 --> M PTSS T5 | 0.281 | 0.035 | <0.001 | -0.012 | 0.079 | 0.882 | 0.093 | 0.095 | 0.327 |
| M PTSS T4 --> F PTSS T5 | 0.281 | 0.035 | <0.001 | 0.077 | 0.045 | 0.089 | 0.051 | 0.052 | 0.322 |
| F PTSS T4 --> F PTSS T5 | 0.281 | 0.035 | <0.001 | 0.476 | 0.072 | <0.001 | 0.516 | 0.062 | <0.001 |
| M PTSS T5 --> M PTSS T6 | 0.293 | 0.047 | <0.001 | 0.508 | 0.085 | <0.001 | 0.561 | 0.055 | <0.001 |
| F PTSS T5 --> M PTSS T6 | 0.293 | 0.047 | <0.001 | -0.012 | 0.079 | 0.882 | -0.205 | 0.119 | 0.086 |
| M PTSS T5 --> F PTSS T6 | 0.2930 | 0.047 | <0.001 | 0.077 | 0.045 | 0.089 | 0.156 | 0.078 | 0.045 |
| F PTSS T5 --> F PTSS T6 | 0.293 | 0.047 | <0.001 | 0.626 | 0.111 | <0.001 | 0.516 | 0.062 | <0.001 |
| Covariance M-F PTSS T6 | 9.231 | 8.269 | 0.264 | 19.439 | 7.615 | 0.011 | 17.559 | 7.353 | 0.017 |
| Covariance M-F PTSS T5 | 1.7760 | 7.389 | 0.810 | 15.490 | 6.120 | 0.011 | 15.111 | 6.044 | 0.012 |
| Covariance M-F PTSS T4 | 34.244 | 17.745 | 0.054 | 33.830 | 17.789 | 0.057 | 34.443 | 17.814 | 0.053 |
| Variance M PTSS T5 | 76.975 | 13.042 | <0.001 | 64.356 | 10.877 | <0.001 | 63.182 | 10.683 | <0.001 |
| Variance F PTSS T5 | 48.311 | 8.249 | <0.001 | 36.166 | 6.159 | <0.001 | 36.030 | 6.134 | <0.001 |
| Variance M PTSS T6 | 76.971 | 13.422 | <0.001 | 62.593 | 10.892 | <0.001 | 60.245 | 10.496 | <0.001 |
| Variance F PTSS T6 | 55.083 | 9.533 | <0.001 | 53.583 | 9.257 | <0.001 | 52.455 | 9.068 | <0.001 |
| Variance M PTSS T4 | 198.266 | 33.493 | <0.001 | 198.730 | 33.590 | <0.001 | 198.759 | 33.594 | <0.001 |
| Variance F PTSS T4 | 103.204 | 17.565 | <0.001 | 103.062 | 17.546 | <0.001 | 103.245 | 17.576 | <0.001 |
| Intercept M PTSS T5 | -1.802 | 1.049 | 0.086 | -3.937 | 1.051 | <0.001 | -3.501 | 1.053 | 0.001 |
| Intercept F PTSS T5 | -7.500 | 0.838 | <0.001 | -5.985 | 0.803 | <0.001 | -5.745 | 0.797 | <0.001 |
| Intercept M PTSS T6 | -2.240 | 1.168 | 0.055 | -3.968 | 1.130 | <0.001 | -5.303 | 1.298 | <0.001 |
| Intercept F PTSS T6 | -6.341 | 1.010 | <0.001 | -4.127 | 1.215 | 0.001 | -4.825 | 0.996 | <0.001 |
| Mean M PTSS T4 | 3.749 | 1.680 | 0.026 | 3.699 | 1.684 | 0.028 | 3.679 | 1.684 | 0.029 |
| Mean F PTSS T4 | -3.883 | 1.220 | 0.001 | -3.816 | 1.221 | 0.002 | -3.866 | 1.222 | 0.002 |
| CFI, AIC, RMSEA | 0.570 | 3012.786 | 0.317 | 0.920 | 2958.696 | 0.177 | 0.944 | 2954.591 | 0.148 |

Note: One week after end of child’s cancer treatment or six months after stem cell transplantation (T4), three months after end of treatment or nine months after transplantation (T5), one year after end of treatment or 18 months after transplantation (T6); M=Mothers; F=Fathers; PTSS=Posttraumatic stress symptoms; est=Points estimate; se=Standard error; p=p-value; CFI=Comparative fit index; AIC=Akaike’s information criterion; RMSEA=Root mean square error of approximation.

**Table 8c.** Actor-Partner Interdependence Model T4-T6, Model 7

|  | **Model 7** | | |
| --- | --- | --- | --- |
|  | **est** | **se** | **p** |
| M PTSS T4 --> M PTSS T5 | 0.534 | 0.040 | <0.001 |
| F PTSS T4 --> M PTSS T5 | 0.055 | 0.037 | 0.138 |
| M PTSS T4 --> F PTSS T5 | 0.055 | 0.037 | 0.138 |
| F PTSS T4 --> F PTSS T5 | 0.534 | 0.040 | <0.001 |
| M PTSS T5 --> M PTSS T6 | 0.534 | 0.040 | <0.001 |
| F PTSS T5 --> M PTSS T6 | 0.055 | 0.037 | 0.138 |
| M PTSS T5 --> F PTSS T6 | 0.055 | 0.037 | 0.138 |
| F PTSS T5 --> F PTSS T6 | 0.534 | 0.040 | <0.001 |
| Covariance M-F PTSS T6 | 18.065 | 7.707 | 0.019 |
| Covariance M-F PTSS T5 | 14.913 | 6.052 | 0.014 |
| Covariance M-F PTSS T4 | 33.933 | 17.794 | 0.057 |
| Variance M PTSS T5 | 63.478 | 10.730 | <0.001 |
| Variance F PTSS T5 | 36.036 | 6.136 | <0.001 |
| Variance M PTSS T6 | 64.405 | 11.210 | <0.001 |
| Variance F PTSS T6 | 54.089 | 9.344 | <0.001 |
| Variance M PTSS T4 | 198.780 | 33.599 | <0.001 |
| Variance F PTSS T4 | 103.065 | 17.546 | <0.001 |
| Intercept M PTSS T5 | -3.538 | 0.973 | <0.001 |
| Intercept F PTSS T5 | -5.676 | 0.750 | <0.001 |
| Intercept M PTSS T6 | -3.381 | 1.027 | 0.001 |
| Intercept F PTSS T6 | -4.839 | 0.948 | <0.001 |
| Mean M PTSS T4 | 3.693 | 1.684 | 0.028 |
| Mean F PTSS T4 | -3.823 | 1.221 | 0.002 |
| CFI, AIC, RMSEA | 0.925 | 2953.768 | 0.133 |

Note: One week after end of child’s cancer treatment or six months after stem cell transplantation (T4), three months after end of treatment or nine months after transplantation (T5), one year after end of treatment or 18 months after transplantation (T6); M=Mothers; F=Fathers; PTSS=Posttraumatic stress symptoms; est=Points estimate; se=Standard error; p=p-value; CFI=Comparative fit index; AIC=Akaike’s information criterion; RMSEA=Root mean square error of approximation.
